# Supplementary material for: Development of an Autophagy Score Signature for Predicting Overall Survival in Papillary Renal Cell Carcinoma
Source: Hindawi journal article supplement (doi:10.1155/2020/8867019), 2020-11-09
Supplement: f1 [file 8867019.f1.pdf]

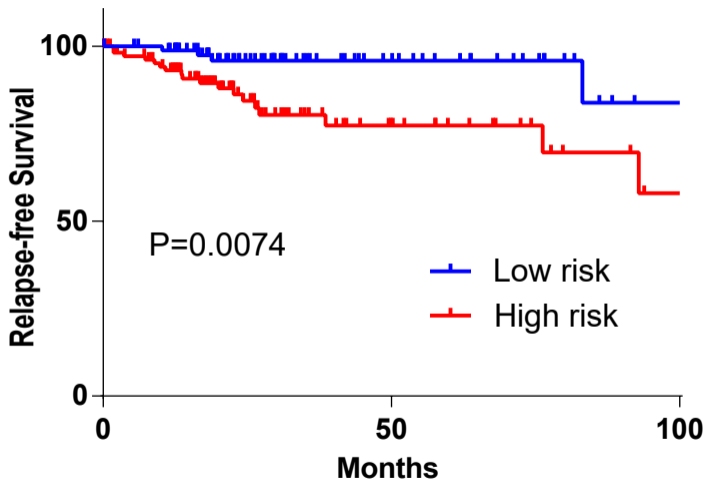

Figure S1
